# Supplementary material for: The role of organic cations as additives in photovoltaic perovskites
Source: Royal Society of Chemistry journal article supplement (doi:10.1039/d3cp01079a), 2023-01-01
Supplement: d3cp01079a1.pdf [file d3cp01079a1.pdf]

# The role of organic cations as additives in photovoltaic perovskites.

Alejandra T. Cadillo-Martínez<sup>a</sup>, Alejandra Vargas-Calderon<sup>a</sup>, Arián Espinosa-Roa<sup>b</sup> and Andrés M. Garay-Tapia<sup>\*a</sup>

<sup>a</sup>Laboratorio de Termodinámica Computacional y Metalurgia Física (TC&MF), CIMAV, S.C. Unidad Monterrey, Apodaca, Nuevo León, México

<sup>b</sup>CONACyT-Centro de Investigación en Química Aplicada, Unidad Monterrey,

Alianza Sur, No. 204, Parque de Innovación e Investigación Tecnológica (PIIT), 66628, Apodaca, Nuevo León, México

Table 1 shows the relationship between adsorption energy and power conversion efficiency (PCE) reported by Wang et al. [1]

Table 1: Relationship of adsorption energy and PCE.

| Additive     | PCE(%) | $E_{ads}$ (eV) |
|--------------|--------|----------------|
| Theophylline | 23.48  | -1.70          |
| Caffeine     | 22.32  | -1.30          |
| Theobromine  | 20.24  | -1.10          |

## Structural configurations

To choose the model, we perform an analysis of the surface energy per layer, this is shown in the Fig. 1 and the following equation is evaluated:

$$\sigma = \frac{E_{slab} - n * E_{bulk}}{A} \quad (1)$$

where  $E_{slab}$  is the total energy of the slab material (eV),  $E_{bulk}$  is the total energy of the bulk material (eV),  $n$  is the number of atoms involved in the slab, and  $A$  is the surface area ( $\text{\AA}^2$ ). Here, the energy is observed to converge when the number of layers is increased, however, there is no significant change in the energy value. Furthermore, we use on purpose the same number of layers as in reference [1] to be able to accurately compare our results with a theoretical-experimental study. The two layers were fixed at the bottom of the surface model to simulate a semi-infinite bulk perovskite.

The four initial horizontal configurations are shown in Fig.2 explicitly.

The six minimum energy configurations after relaxation of the perovskite/additive systems are shown in Fig.3. It shows clearly how the carbonyl oxygen occupy the vacant sites of I. This is the place where the formation of the octahedrons occurs.

## Energy adsorption

The following table lists the adsorption energy values obtained for the 30 configurations studied. The analysis presented in this work, is only based in the minimum energy configurations.

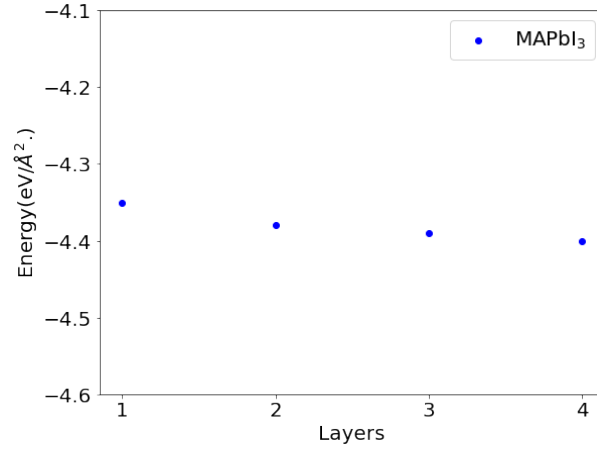

Figure 1: Horizontal configurations sites.

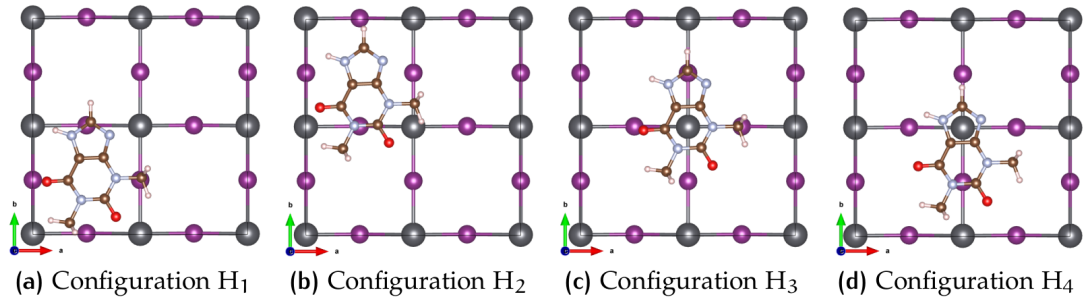

Figure 2: Horizontal configurations sites.

Table 2: Adsorption energies of organic molecules and organic cations on the cubic [001]-PbI<sub>2</sub> surface.

| Additive                                 | $E_{ads}(\text{eV})$ | Additive                                | $E_{ads}(\text{eV})$ | Additive                             | $E_{ads}(\text{eV})$ |
|------------------------------------------|----------------------|-----------------------------------------|----------------------|--------------------------------------|----------------------|
| Theophylline H <sub>1</sub>              | -1.97                | Theobromine H <sub>1</sub>              | -1.98                | Caffeine H <sub>1</sub>              | -2.05                |
| Theophylline H <sub>2</sub>              | -2.63                | Theobromine H <sub>2</sub>              | -2.03                | Caffeine H <sub>2</sub>              | -1.84                |
| Theophylline H <sub>3</sub>              | -2.56                | Theobromine H <sub>3</sub>              | -1.58                | Caffeine H <sub>3</sub>              | -1.73                |
| Theophylline H <sub>4</sub>              | -2.45                | Theobromine H <sub>4</sub>              | -2.12                | Caffeine H <sub>4</sub>              | -2.10                |
| Theophylline V                           | -2.04                | Theobromine V                           | -1.19                | Caffeine V                           | -0.90                |
| Theophylline <sup>+</sup> H <sub>1</sub> | -3.24                | Theobromine <sup>+</sup> H <sub>1</sub> | -2.85                | Caffeine <sup>+</sup> H <sub>1</sub> | -3.26                |
| Theophylline <sup>+</sup> H <sub>2</sub> | -3.08                | Theobromine <sup>+</sup> H <sub>2</sub> | -3.01                | Caffeine <sup>+</sup> H <sub>2</sub> | -3.02                |
| Theophylline <sup>+</sup> H <sub>3</sub> | -3.15                | Theobromine <sup>+</sup> H <sub>3</sub> | -2.83                | Caffeine <sup>+</sup> H <sub>3</sub> | -2.75                |
| Theophylline <sup>+</sup> H <sub>4</sub> | -3.20                | Theobromine <sup>+</sup> H <sub>4</sub> | -3.26                | Caffeine <sup>+</sup> H <sub>4</sub> | -3.34                |
| Theophylline <sup>+</sup> V              | -2.28                | Theobromine <sup>+</sup> V              | -2.24                | Caffeine <sup>+</sup> V              | -2.36                |

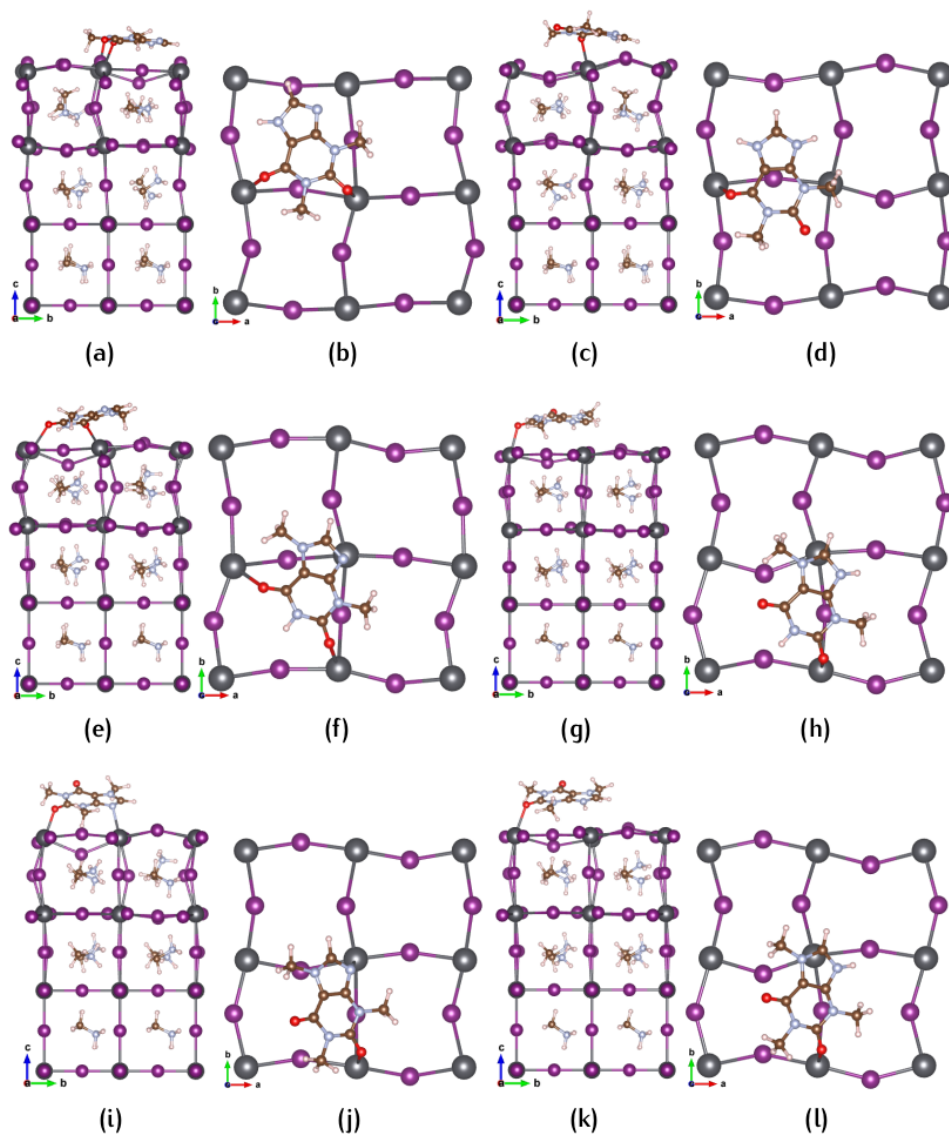

Figure 3: Lower adsorption energy configurations. (a) Theophylline, (c) theophylline<sup>+</sup>, (e) theobromine, (g) theobromine<sup>+</sup>, (i) caffeine, (k) caffeine<sup>+</sup> and (b),(d),(f),(h),(j),(l) are top views.

The formulas for evaluating the adsorption energy by contribution are described below. The adsorption energy corresponding to the Van der Waals energy is calculated as:

$$E_{vdW} = (E_{sys-with-vdW} - E_{sys-without-vdW}) - (E_{surf-with-vdW} - E_{surf-without-vdW}) - (E_{additive-with-vdW} - E_{additive-without-vdW}) \quad (2)$$

To evaluate the effect of atomic surface relaxation, the additives are canceled and the formula is as follows:

$$\begin{aligned} E_{relax} &= E_{ads/surf-relax} - E_{ads} \\ &= E_{surf-relax} - E_{surf} \end{aligned} \quad (3)$$

Finally, the interaction energy of the additive with the surface is calculated as:

$$E_{int} = E_{ads} - E_{vdW} - E_{relax} \quad (4)$$

To determine the effect of surface size, we perform a calculation for a larger surface with the most reactive molecule. Fig.4 shows this system, the cell has been increased by  $2^{0.5}a \times 2^{0.5}a \times 1$ . Here it is observed that the formation of the two octahedrons of the carbonyls with the Pb on the surface is present too as with the smaller surface.

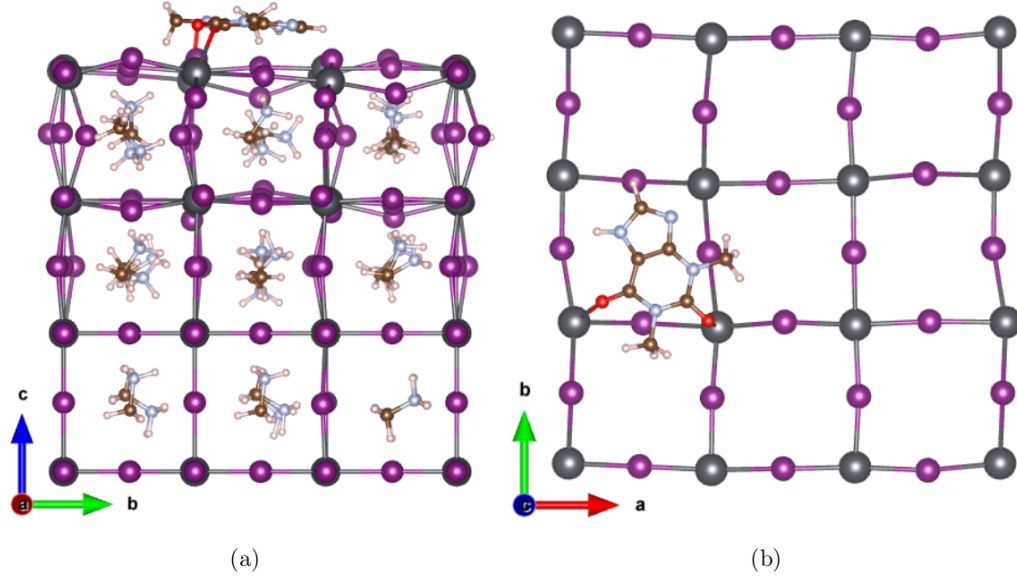

Figure 4: Theophylline. (a)Lateral view and (b)top view.

Table 3 shows a comparative values of the adsorption energies for the 2x2 and 3x3 supercells for the most reactive molecular additive (theophylline). In the 3x3 model, the contribution to the van der Waals energy increases due to the size of the system, however, the comparison of the adsorption energies without the van der Waals contribution gives the same value in both systems. Although the ideal would be to use a larger surface model, we think that good approximations are obtained with our model. We have sought a balance between computational cost and accuracy.

Table 3: Comparative values of the adsorption energies for the 2x2 and 3x3 supercells.

| Supercell model | $E_{ads}$ (eV) | $E_{vdW}$ (eV) | $E_{ads}-E_{vdW}$ (eV) |
|-----------------|----------------|----------------|------------------------|
| 2x2             | -2.63          | -1.02          | -1.61                  |
| 3x3             | -2.71          | -1.11          | -1.61                  |

## Charge Transfer

Table 4 shows the charge transfer for the additives of minimum adsorption energy.

Table 4: Charge transfer for additives with minimum energy of adsorption.

| Additive                                 | Max $\Delta Q$ (electron transfer e) |
|------------------------------------------|--------------------------------------|
| Theophylline H <sub>2</sub>              | 0.136                                |
| Theophylline <sup>+</sup> H <sub>1</sub> | 0.258                                |
| Theobromine H <sub>4</sub>               | 0.083                                |
| Theobromine <sup>+</sup> H <sub>4</sub>  | 0.267                                |
| Caffeine H <sub>4</sub>                  | 0.132                                |
| Caffeine <sup>+</sup> H <sub>4</sub>     | 0.267                                |

## References

- [1] R. Wang, J. Xue, K.-L. Wang, Z.-K. Wang, Y. Luo, D. Fenning, G. Xu, S. Nuryyeva, T. Huang, Y. Zhao, J. Yang, J. Zhu, M. Wang, S. Tan, I. Yavuz, K. Houk, and Y. Yang, “Constructive molecular configurations for surface-defect passivation of perovskite photovoltaics,” *Science (New York, N.Y.)*, vol. 366, pp. 1509–1513, 12 2019.
